# Supplementary material for: Species Diversity of Helvella lacunosa Clade (Pezizales, Ascomycota) in China and Description of Sixteen New Species
Source: J Fungi (Basel). 2023 Jun 23;9(7):697. doi: 10.3390/jof9070697 (PMC10381826; doi:10.3390/jof9070697)
Supplement: Supplementary file 1 [file jof-09-00697-s001.zip]

Archive with 5 entries (5 files):
- FigureS1 Hsp90.pdf
- FigureS2 ITS.pdf
- FigureS3 LSU.pdf
- FigureS4 TEF.pdf
- Supplementary Legends.pdf
